# Supplementary material for: Clinical validation of the next-generation sequencing-based Extended RAS Panel assay using metastatic colorectal cancer patient samples from the phase 3 PRIME study
Source: Springer Nature journal article supplement (doi:10.1007/s00432-018-2688-3), 2018-07-17
Supplement: MOESM1 [file 15959356]

Clinical validation of the next-generation sequencing–based Extended RAS Panel assay using metastatic colorectal cancer patient samples from the phase 3 PRIME study

*Journal of Cancer Research and Clinical Oncology*

Nitin Udar, Catherine Lofton-Day, Jun Dong, Darcy Vavrek, A. Scott Jung, Kristen Meier, Anita Iyer, Ryan Slaughter, Karen Gutekunst, Bruce A. Bach, Marc Peeters, and Jean-Yves Douillard

**Corresponding author:** Nitin Udar, PhD  
Illumina, Inc.  
5200 Illumina Way  
San Diego, CA 92122  
Phone: 1-858-699-6416  
Email: greatbioinformatics@yahoo.com

**Supplementary Material**

**Table S1. Extended RAS Panel Summary of 56 Mutations**

| <b>Gene and Exon</b> | <b>Amino Acid</b> | <b>Mutation</b> | <b>Location</b> |
|----------------------|-------------------|-----------------|-----------------|
| <i>KRAS</i> Exon 2   | p.Gly12Ser        | G>A             | c.34            |
|                      | p.Gly12Arg        | G>C             | c.34            |
|                      | p.Gly12Cys        | G>T             | c.34            |
|                      | p.Gly12Asn        | GG>AA           | c.34_35         |
|                      | p.Gly12Phe        | GG>TT           | c.34_35         |
|                      | p.Gly12Trp        | GGT>TGG         | c.34_36         |
|                      | p.Gly12Asp        | G>A             | c.35            |
|                      | p.Gly12Ala        | G>C             | c.35            |
|                      | p.Gly12Val        | G>T             | c.35            |
|                      | p.Gly13Arg        | G>C             | c.37            |
|                      | p.Gly13Cys        | G>T             | c.37            |
|                      | p.Gly13Asp        | G>A             | c.38            |
|                      | p.Gly13Glu        | GC>AA           | c.38_39         |
|                      | p.Gly13Asp        | GC>AT           | c.38_39         |
|                      | p.Gly13Val        | GC>TT           | c.38_39         |
| <i>KRAS</i> Exon 3   | p.Ala59Thr        | G>A             | c.175           |
|                      | p.Ala59Gly        | C>G             | c.176           |
|                      | p.Gln61Lys        | C>A             | c.181           |
|                      | p.Gln61Glu        | C>G             | c.181           |
|                      | p.Gln61Arg        | A>G             | c.182           |
|                      | p.Gln61Leu        | A>T             | c.182           |
|                      | p.Gln61His        | A>C             | c.183           |
|                      | p.Gln61His        | A>T             | c.183           |
| <i>KRAS</i> Exon 4   | p.Lys117Asn       | A>C             | c.351           |
|                      | p.Lys117Asn       | A>T             | c.351           |
|                      | p.Ala146Thr       | G>A             | c.436           |
|                      | p.Ala146Pro       | G>C             | c.436           |
|                      | p.Ala146Val       | C>T             | c.437           |
| <i>NRAS</i> Exon 2   | p.Gly12Ser        | G>A             | c.34            |
|                      | p.Gly12Arg        | G>C             | c.34            |
|                      | p.Gly12Cys        | G>T             | c.34            |
|                      | p.Gly12Asn        | GG>AA           | c.34_35         |
|                      | p.Gly12Phe        | GG>TT           | c.34_35         |
|                      | p.Gly12Trp        | GGT>TGG         | c.34_36         |
|                      | p.Gly12Asp        | G>A             | c.35            |
|                      | p.Gly12Ala        | G>C             | c.35            |
|                      | p.Gly12Val        | G>T             | c.35            |
|                      | p.Gly13Arg        | G>C             | c.37            |
|                      | p.Gly13Cys        | G>T             | c.37            |
|                      | p.Gly13Asp        | G>A             | c.38            |

|                    |             |       |         |
|--------------------|-------------|-------|---------|
|                    | p.Gly13Val  | G>T   | c.38    |
|                    | p.Gly13Glu  | GT>AA | c.38_39 |
|                    | p.Gly13Glu  | GT>AG | c.38_39 |
| <i>NRAS</i> Exon 3 | p.Ala59Thr  | G>A   | c.175   |
|                    | p.Ala59Gly  | C>G   | c.176   |
|                    | p.Gln61Lys  | C>A   | c.181   |
|                    | p.Gln61Glu  | C>G   | c.181   |
|                    | p.Gln61Arg  | A>G   | c.182   |
|                    | p.Gln61Leu  | A>T   | c.182   |
|                    | p.Gln61His  | A>C   | c.183   |
|                    | p.Gln61His  | A>T   | c.183   |
| <i>NRAS</i> Exon 4 | p.Lys117Asn | G>C   | c.351   |
|                    | p.Lys117Asn | G>T   | c.351   |
|                    | p.Ala146Thr | G>A   | c.436   |
|                    | p.Ala146Pro | G>C   | c.436   |
|                    | p.Ala146Val | C>T   | c.437   |

**Table S2. Baseline Disease Characteristics for Efficacy Analysis Sets<sup>a</sup>**

| Characteristic <sup>b</sup>                                                                 | RAS Negative                        |                             | RAS Positive                        |                             | Unevaluable RAS                     |                             |
|---------------------------------------------------------------------------------------------|-------------------------------------|-----------------------------|-------------------------------------|-----------------------------|-------------------------------------|-----------------------------|
|                                                                                             | Panitumumab<br>+ FOLFOX4<br>(n=106) | FOLFOX4<br>Alone<br>(n=111) | Panitumumab<br>+ FOLFOX4<br>(n=163) | FOLFOX4<br>Alone<br>(n=148) | Panitumumab<br>+ FOLFOX4<br>(n=324) | FOLFOX4<br>Alone<br>(n=331) |
| Primary tumor type, n (%)                                                                   |                                     |                             |                                     |                             |                                     |                             |
| Colon cancer                                                                                | 78 (74)                             | 72 (65)                     | 117 (72)                            | 115 (78)                    | 199 (61)                            | 211 (64)                    |
| Rectal cancer                                                                               | 28 (26)                             | 39 (35)                     | 46 (28)                             | 33 (22)                     | 125 (39)                            | 120 (36)                    |
| Adenocarcinoma differential of primary tumor<br>well or moderately differentiated,<br>n (%) | 71 (67)                             | 70 (63)                     | 123 (76)                            | 109 (74)                    | 219 (68)                            | 223 (67)                    |
| Months since primary diagnosis, <sup>c</sup><br>mean (SD)                                   | 10.0 (18.1)                         | 7.7 (14.3)                  | 8.7 (15.4)                          | 7.4 (15.0)                  | 9.4 (20.3)                          | 10.4 (18.4)                 |
| Months since metastatic disease diagnosis, <sup>c</sup><br>mean (SD)                        | 2.8 (4.8)                           | 2.1 (1.9)                   | 2.1 (2.1)                           | 2.6 (6.5)                   | 2.1 (4.7)                           | 2.2 (3.8)                   |
| ≥3 sites of metastatic disease, n (%)                                                       | 39 (37)                             | 47 (42)                     | 74 (45)                             | 66 (45)                     | 166 (51)                            | 150 (45)                    |
| Location of sites of metastatic disease,<br>n (%)                                           |                                     |                             |                                     |                             |                                     |                             |
| Liver only                                                                                  | 17 (16)                             | 22 (20)                     | 25 (15)                             | 21 (14)                     | 52 (16)                             | 54 (16)                     |
| Liver plus other sites                                                                      | 75 (71)                             | 74 (67)                     | 113 (69)                            | 111 (75)                    | 231 (71)                            | 230 (69)                    |
| ECOG performance status, n (%)                                                              |                                     |                             |                                     |                             |                                     |                             |
| 0 – Asymptomatic                                                                            | 62 (58)                             | 56 (50)                     | 86 (53)                             | 76 (51)                     | 184 (57)                            | 188 (57)                    |
| 1 – Symptomatic, ambulatory                                                                 | 37 (35)                             | 48 (43)                     | 70 (43)                             | 66 (45)                     | 123 (38)                            | 124 (37)                    |
| 2 – Symptomatic, >50% out of bed                                                            | 7 (7)                               | 6 (5)                       | 7 (4)                               | 6 (4)                       | 17 (5)                              | 17 (5)                      |
| Elevated CEA above normal range, n (%)                                                      | 78 (75)                             | 85 (80)                     | 138 (87)                            | 119 (83)                    | 262 (83)                            | 254 (80)                    |
| Baseline LDH concentration, n (%)                                                           |                                     |                             |                                     |                             |                                     |                             |
| ≥1.5 × ULN                                                                                  | 24 (23)                             | 29 (26)                     | 51 (31)                             | 41 (28)                     | 105 (32)                            | 107 (32)                    |
| ≥2.0 × ULN                                                                                  | 17 (16)                             | 21 (19)                     | 35 (21)                             | 29 (20)                     | 74 (23)                             | 72 (22)                     |
| Alkaline phosphatase ≥2.0 × ULN, n (%)                                                      | 19 (18)                             | 23 (21)                     | 41 (25)                             | 35 (24)                     | 92 (28)                             | 70 (21)                     |

CEA=carcinoembryonic antigen; ECOG=Eastern Cooperative Oncology Group; LDH=serum lactate dehydrogenase; ULN=upper limit of normal.

<sup>a</sup>The data cutoff date for this analysis was August 28, 2009.

<sup>b</sup>Percentages are based on the number of patients randomized.

<sup>c</sup>Date of randomization minus date of primary diagnosis or metastatic disease diagnosis.

**Table S3. Listing of Discrepant Calls (FP and FN) at the Mutation Level (dCq ≤5.0)**

| <b>Sanger Result</b>                            | <b>Extended RAS Panel Result</b>                  | <b>Disagreement Location</b>                    |                        |
|-------------------------------------------------|---------------------------------------------------|-------------------------------------------------|------------------------|
|                                                 |                                                   | <b>FN</b>                                       | <b>FP</b>              |
| <i>KRAS</i> 3 c.181C>A                          | Mutation negative                                 | <i>KRAS</i> 3 c.181C>A                          | •                      |
| <i>KRAS</i> 2 c.35G>T                           | Mutation negative                                 | <i>KRAS</i> 2 c.35G>T                           | •                      |
| <i>KRAS</i> 2 c.34G>A,<br><i>KRAS</i> 2 c.35G>T | Mutation negative                                 | <i>KRAS</i> 2 c.34G>A,<br><i>KRAS</i> 2 c.35G>T | •                      |
| Mutation negative                               | <i>KRAS</i> 2 c.35G>A                             | •                                               | <i>KRAS</i> 2 c.35G>A  |
| Mutation negative                               | <i>KRAS</i> 2 c.35G>C                             | •                                               | <i>KRAS</i> 2 c.35G>C  |
| Mutation negative                               | <i>KRAS</i> 2 c.35G>T                             | •                                               | <i>KRAS</i> 2 c.35G>T  |
| Mutation negative                               | <i>NRAS</i> 3 c.181C>A                            | •                                               | <i>NRAS</i> 3 c.181C>A |
| Mutation negative                               | <i>NRAS</i> 2 c.34G>T                             | •                                               | <i>NRAS</i> 2 c.34G>T  |
| <i>KRAS</i> 4 c.351A>C                          | <i>NRAS</i> 2 c.38G>A                             | <i>KRAS</i> 4 c.351A>C                          | <i>NRAS</i> 2 c.38G>A  |
| <i>KRAS</i> 2 c.34G>T                           | <i>KRAS</i> 2 c.34G > T,<br><i>KRAS</i> 2 c.35G>C | •                                               | <i>KRAS</i> 2 c.35G>C  |
| <i>KRAS</i> 2 c.38G>A                           | <i>KRAS</i> 2 c.35G>T,<br><i>KRAS</i> 2 c.38G>A   | •                                               | <i>KRAS</i> 2 c.35G>T  |

**Table S4. Prevalence of RAS Mutations**

| <b>All RAS Wild-Type</b> | <b>Any RAS Mutant</b>     |                                          |
|--------------------------|---------------------------|------------------------------------------|
| 47.39%                   | 52.61%                    |                                          |
| <b>All RAS Wild-Type</b> | <b>KRAS Exon 2 Mutant</b> | <b>KRAS Exon 2 Wild-Type, Mutant RAS</b> |
| 47.39%                   | 39.82%                    | 12.78%                                   |

Fig S1. Distribution of detected *KRAS* and *NRAS* exons

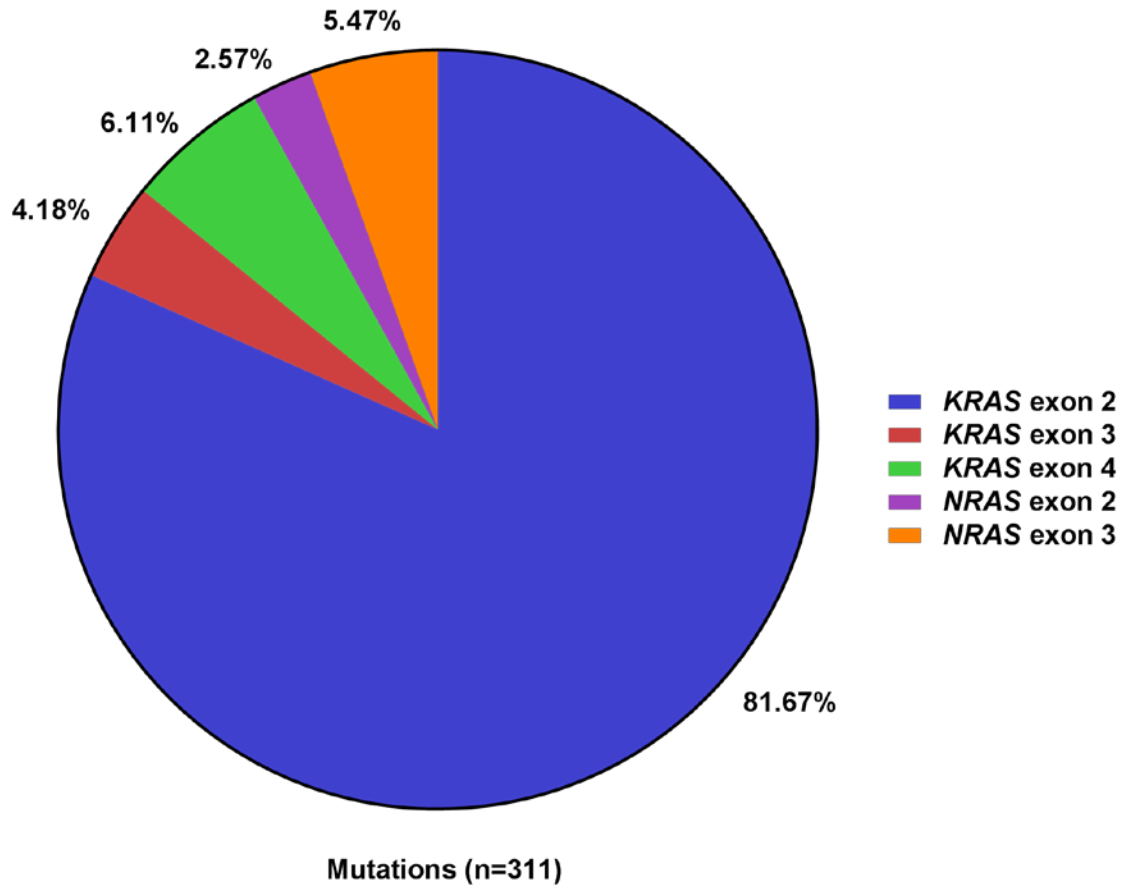

Figure generated using GraphPad Prism 7.
